**Body mass affects seasonal variation in sickness intensity in a seasonally-breeding rodent**

Elizabeth D. Carlton\* and Gregory E. Demas

Department of Biology, Program in Neuroscience and Center for the  
Integrative Study of Animal Behavior  
Indiana University, Bloomington, IN, 47405 USA

\* Address correspondence to:

Elizabeth Carlton  
Department of Biology  
1001 E. 3<sup>rd</sup> Street  
Indiana University  
Bloomington, IN 47405 USA

Phone: (812) 855-6257  
Fax: (812) 855-6705  
Email: [elcarlo@indiana.edu](mailto:elcarlo@indiana.edu)

## ABSTRACT

Species that display seasonal variation in sickness intensity show the most intense response in the season during which they have the highest body mass, suggesting that sickness intensity may be limited by an animal's energy stores. Siberian hamsters (*Phodopus sungorus*) display lower body masses and less intense sickness when housed in short, winter-like days as opposed to long, summer-like days. To determine if reduced sickness intensity displayed by short-day hamsters is a product of seasonal changes in body mass, we food-restricted long-day hamsters so that they exhibited body mass loss that mimicked the natural photoperiod-induced loss of body mass in short-day hamsters. We then experimentally induced sickness with lipopolysaccharide (LPS) and compared sickness responses among long-day food restricted and long- and short-day *ad libitum* fed groups, predicting that long-day restricted hamsters would show sickness responses comparable to short-day *ad libitum* hamsters and attenuated in comparison to long-day *ad libitum* hamsters. We found that long-day restricted hamsters showed attenuated LPS-induced anorexia, loss of body mass, and hypothermia compared to long-day *ad libitum* animals; however, anorexia remained elevated in long-day restricted animals as compared to short-day *ad libitum* animals. Additionally, LPS-induced anhedonia and decreases in nest building were not influenced by body mass. Results of hormone assays suggest that cortisol levels could play a role in the attenuation of sickness in long-day restricted hamsters, indicating that future research should target the roles of glucocorticoids and natural variation in energy stores in seasonal sickness variation.

## INTRODUCTION

Mounting an appropriate immune response to infection is a necessity for survival in a pathogen-rich environment. An organism's immune response is sensitive to both its external and internal environments and can be influenced by variables such as environmental temperature, photoperiod, stress, reproductive effort, and energy stores (Sheldon and Verhulst, 1996; Demas and Nelson, 1998; Lochmiller and Deerenberg, 2000; Martin et al., 2008a). While each of these variables can fluctuate individually across short time spans, for seasonally breeding animals, these variables often change simultaneously with transitions between seasons. Therefore, one challenge for determining the specific physiological and environmental variables underlying seasonal changes in immunity is disentangling the effects of each of these variables from one another.

The acute phase response (APR) is one component of the immune system that can vary seasonally (Adelman and Martin, 2009; Ashley and Wingfield, 2012). When the APR is activated at an infection site, neutrophils and macrophages release pro-inflammatory cytokines which not only facilitate the recruitment of other immune cells to this local site of infection, but also act on the brain to generate sickness responses. Sickness responses are characterized by fever or hypothermia, anorexia, body mass loss, reductions in social and hedonic behaviors, and hypothalamic-pituitary-adrenal (HPA) endocrine axis activation (Hart, 1988; Tizard, 2008). These sickness symptoms are generated as adaptive mechanisms for fighting off infection (Hart, 1988), and in several seasonally breeding animals, sickness intensity varies across the seasons (Bilbo et al., 2002; Owen-Ashley et al., 2006; Owen-Ashley and Wingfield, 2006; Owen-Ashley et al., 2008). Because generating a sickness response is critical for eliminating pathogens, variation in the magnitude of this response can profoundly affect an animal's ability to survive an infection (Kluger et al., 1975; Murray and Murray, 1979; Vaughn et al., 1980). Thus, questions remain: why and how seasonally breeding animals are modulating sickness intensity?

When looking across species in which seasonally variable sickness responses have been documented, the common variable that predicts which season an animal will show reduced or enhanced sickness is the animal's body mass, not reproductive state or day length (Ashley and Wingfield, 2012; Carlton et al., 2012). Specifically, seasonally breeding animals show attenuated sickness responses to the bacterial mimetic lipopolysaccharide (LPS) in the season that they have the lowest body masses (Bilbo et al., 2002; Owen-Ashley et al., 2006; Owen-Ashley and Wingfield, 2006; Owen-Ashley et al., 2008). Siberian hamsters (*Phodopus sungorus*) are one species that displays seasonal variation in sickness intensity. Hamsters

display more intense sickness responses (i.e., greater fever amplitude, longer durations of and greater decreases in food intake and body mass loss, greater decreases in hedonic and nest building behaviors) to LPS when housed in long, summer-like photoperiods as compared to short, winter-like photoperiods (Bilbo et al., 2002; Wen et al., 2007; Wen and Prendergast, 2007). Hamsters housed in long photoperiods remain reproductively active and show higher body masses than hamsters housed in reproductively inhibiting short-day photoperiods. Previous studies have manipulated reproductive state and patterns of endogenous melatonin (i.e., an indoleamine hormone whose release acts as a physiological signal of photoperiod) to determine their contributions to seasonal variation in sickness intensity in Siberian hamsters (Freeman et al., 2007; Wen et al., 2007; Prendergast et al., 2008). While these manipulations modulated some sickness symptoms, they also resulted in body mass changes (Bilbo and Nelson, 2002; Wen et al., 2007; Prendergast et al., 2008). Therefore, while there were clearly effects of reproductive state and melatonin on seasonal variation in sickness, it is unclear if intensity was mediated directly by the manipulations or indirectly through changes in energetic state.

In a previous study, we manipulated a hormonal correlate of energetic state (i.e., leptin) in order to disentangle the effects of seasonal energetic changes from other seasonally modulated variables on sickness intensity variation (Carlton and Demas, 2014). Leptin levels are directly proportional with adipose tissue mass in mammals (Maffei et al., 1995; Johnson et al., 2004), and leptin changes seasonally, in parallel with seasonal changes in body mass, in Siberian hamsters and other seasonally breeding animals (Horton et al., 2000; Concannon et al., 2001; Gaspar-Lopez et al., 2009). We experimentally elevated circulating leptin levels in short-day Siberian hamsters so that they were comparable to long-day levels. We found that leptin treatment resulted in short-day hamsters showing hypothermic responses to LPS that were more long-day-like. Short-day hamsters treated with leptin, however, showed LPS-induced anorexia that was not enhanced to the levels of long-day animals, but instead, was attenuated even below that of typical short-day levels. These results suggest that leptin modulates some but not all aspects of seasonal sickness variation. As leptin is only one of many energetic hormones, our findings did not eliminate the hypothesis that seasonal variation in sickness intensity is mediated by changes in energy stores. The goals of the present study were to manipulate seasonal energy stores, by using food restriction in long-day hamsters to mimic the pattern of seasonal body mass loss in short-day hamsters, to determine its effects on sickness intensity and to elucidate a potential hormonal mechanism mediating any changes in intensity. If seasonal variation in sickness intensity is driven by seasonal

changes in energy stores, then we expected long-day hamsters displaying body mass loss patterns like short-day hamsters to show similar sickness intensity to short-day hamsters and less intensity than long-day hamsters fed *ad libitum*.

## RESULTS

An experimental timeline is presented in Figure 1 in order to clarify at which timepoints measures were collected.

### Experimental induction of body mass loss

Body mass did not differ among the groups prior to experimental housing ( $F_{2,72} = 0.281$ ,  $P = 0.756$ ). After 70 days in experimental photoperiods and food restriction for the long-day food-restricted group (LD-FR), body mass differed among the groups ( $F_{2,72} = 25.372$ ,  $P < 0.001$ ) (Fig. 2). Long-day *ad libitum* (LD-AdLib) hamsters showed no change in body mass from days 0 to 70 (Paired  $T = 0.230$ ,  $P = 0.821$ ), while short-day *ad libitum* (SD-AdLib) and LD-FR hamsters showed 22.3% and 22.0% decreases in body mass, respectively. There were no differences in body mass at day 70 between the LD-FR and SD-AdLib groups ( $T_{17} = 0.117$ ,  $P = 0.907$ ).

### Pre-injection baseline measures

At the end of those 70 days and until the end of the experiment, LD-FR animals were allocated food at their pre-restriction mean values. Pre-injection baseline food consumption differed among the groups ( $F_{2,72} = 12.143$ ,  $P < 0.001$ ) (Table 1). Specifically, SD-AdLib hamsters consumed less food than LD-AdLib and LD-FR hamsters ( $T > 3.560$ ,  $P < 0.001$  for both comparisons), while there was no difference in consumption between the LD-AdLib and LD-FR hamsters ( $T = 1.181$ ,  $P = 0.241$ ). LD-FR body mass did increase slightly upon access to pre-restriction mean food levels (Paired  $T = 5.105$ ,  $P < 0.001$ ); however, pre-injection baseline body masses still did not differ between the LD-FR and SD-AdLib groups ( $T = 1.495$ ,  $P = 0.139$ ) (Table 1). While body mass did not differ between the LD-FR and SD-AdLib groups, serum leptin levels differed among all three groups ( $F_{2,72} = 25.412$ ,  $P < 0.001$ ) (Table 1). Specifically, LD-AdLib hamsters showed the highest leptin concentrations, while LD-FR and SD-AdLib hamsters had leptin concentrations 33.5% and 67.1%, respectively, lower than this group.

Pre-injection baseline saccharin solution intake varied among the groups ( $F_{2,72} = 16.917$ ,  $P < 0.001$ ) (Table 1). Specifically, LD-FR animals consumed greater volumes of

saccharin solution as compared to LD-AdLib ( $T = 3.428$ ,  $P = 0.001$ ) and SD-AdLib ( $T = 5.782$ ,  $P < 0.001$ ) animals. There was no difference in pre-injection baseline saccharin solution intake between the LD-AdLib and SD-AdLib groups ( $T = 1.646$ ,  $P = 0.104$ ). Pre-injection baseline percent nesting material shredded also differed by group prior to injection ( $H = 15.105$ ,  $P < 0.001$ ) (Table 1). Specifically, LD-FR animals shredded a lower percentage of their cotton nestlet as compared to LD-AdLib ( $Z = 1.987$ ,  $P = 0.047$ ) and SD-AdLib ( $Z = 3.813$ ,  $P < 0.001$ ) animals. There was no difference in percent nesting material shredded between the LD-FR and SD-AdLib groups ( $Z = 1.136$ ,  $P = 0.256$ ).

### Post-injection sickness measures

#### *Anorexia*

Percent changes in food intake were affected by group ( $F_{2,69} = 5.325$ ,  $P = 0.007$ ) and by injection ( $F_{1,69} = 158.030$ ,  $P < 0.001$ ) but not by the group x injection interaction ( $F_{2,69} = 0.314$ ,  $P = 0.731$ ) (Fig. 3). Percent changes in food intake varied across the four days after injection (within subjects,  $F_{3,67} = 157.130$ ,  $P < 0.001$ ) and with the time x group ( $F_{6,134} = 3.521$ ,  $P = 0.003$ ) and the time x injection ( $F_{3,67} = 157.130$ ,  $P < 0.001$ ) interactions. All LPS-treated animals showed greater decreases in food intake compared to their respective saline-treated controls during days 1, 2, and 3 post-injection ( $P < 0.003$  for all comparisons). By day 4, the LPS-treated LD-FR and SD-AdLib groups no longer showed reduced food intake compared to controls ( $P > 0.06$  for both comparisons); however, the LPS-treated LD-AdLib group still showed reduced food intake on this day as compared to controls ( $P = 0.006$ ). Additionally, at day 4 post-injection, the LPS-treated LD-AdLib group showed greater percent decreases in food intake than the LPS-treated SD-AdLib group ( $P = 0.016$ ) but not the LD-FR group ( $P = 0.149$ ).

#### *Body mass loss*

Percent changes in body mass were affected by group ( $F_{2,69} = 11.896$ ,  $P < 0.001$ ) and by injection ( $F_{1,69} = 174.759$ ,  $P < 0.001$ ) but not by the group x injection interaction ( $F_{2,69} = 1.034$ ,  $P = 0.361$ ) (Fig. 4). Percent decreases in body mass changed across the four days post injection (within subjects,  $F_{2.2,149.4} = 7.545$ ,  $P < 0.001$ ) and with the time x group ( $F_{4.3,149.4} = 2.809$ ,  $P = 0.024$ ), time x injection ( $F_{2.2,149.4} = 12.564$ ,  $P < 0.001$ ), and time x group x injection ( $F_{4.3,149.4} = 4.096$ ,  $P = 0.003$ ) interactions. During all 4 days after injection, LPS-

treated animals showed greater percent decreases in body mass as compared to their respective saline-treated controls ( $P < 0.001$  for all comparisons); however, the LPS-treated LD-FR and SD-AdLib groups showed attenuated percent decreases in body mass relative to the LPS-treated LD-AdLib group. Specifically, the LD-FR group showed lesser percent body mass decreases as compared to the LD-AdLib group on days 2, 3, and 4 post-LPS injection ( $P < 0.02$  for all comparisons), while the SD-AdLib group showed lesser decreases in percent body mass loss on days 3 and 4 post-LPS injection ( $P < 0.002$  for both comparisons).

In LPS-treated animals, percent change in body mass was negatively correlated with pre-injection baseline body mass, such that animals with greater initial body masses showed greater percent decreases in body mass on days 3 (body mass:  $F_{1,34} = 9.011$ ,  $P = 0.005$ ; group:  $F_{2,34} = 2.644$ ,  $P = 0.086$ ) and 4 (body mass:  $F_{1,34} = 6.037$ ,  $P = 0.019$ ; group:  $F_{2,34} = 3.771$ ,  $P = 0.033$ ) but not days 1 or 2 ( $P > 0.05$  for body mass on both days). In addition, the maximum percent change in body mass that each LPS-treated animal displayed after injection was not correlated with pre-injection baseline body mass (body mass:  $F_{1,34} = 1.890$ ,  $P = 0.178$ ; group:  $F_{2,34} = 2.852$ ,  $P = 0.0716$ ).

### *Body temperature*

Colonic temperature differed by group ( $F_{2,69} = 7.368$ ,  $P = 0.001$ ) and injection ( $F_{1,69} = 44.515$ ,  $P < 0.001$ ) but not by the group x injection interaction ( $F_{2,69} = 1.302$ ,  $P = 0.279$ ) (Fig. 5). Colonic temperature changed across time (within subjects,  $F_{6,0,415.4} = 180.880$ ,  $P < 0.001$ ) and with the time x injection ( $F_{6,0,415.4} = 34.795$ ,  $P < 0.001$ ) and time x group x injection ( $F_{2,3,12,0} = 2.329$ ,  $P = 0.007$ ) interactions. Among saline-injected animals, the SD-AdLib group showed higher temperatures than the LD-AdLib and LD-FR groups at 8, 10, and 16 h post-injection ( $P < 0.05$ ). LPS injection resulted in a hypothermic response across all groups at most time points after injection. However, at 2 h post-injection, LPS-treated SD-AdLib and LD-FR hamsters showed greater temperatures as compared to their respective saline controls ( $P < 0.003$ ); the temperature of LPS-treated LD-AdLib hamsters did not differ from that of the saline-treated controls at this time point ( $P = 0.369$ ). LPS-treated animals in all groups exhibited hypothermic responses as compared to their respective saline controls starting at either 4 h post-injection (LD-AdLib) or 6 h post-injection (SD-AdLib and LD-FR) throughout the end of the 24 h measurement period ( $P < 0.05$  for all comparisons except SD-AdLib at 20 h post-injection). The temperature of the LPS-treated LD-AdLib group was lower than the temperature of the LPS-treated SD-AdLib group at 4, 8, 10, and 16 h post-

injection ( $P < 0.05$  for these comparisons), while the temperature of the LD-FR group was only lower than that of the SD-AdLib group at 8 h post-injection ( $P = 0.016$ ).

#### *Saccharin solution intake*

Percent change in saccharin solution intake was affected by injection treatment only ( $F_{1,69} = 7.600$ ,  $P = 0.008$ ) and not by group ( $F_{2,69} = 1.089$ ,  $P = 0.342$ ) or the group x injection interaction ( $F_{2,69} = 0.885$ ,  $P = 0.418$ ) (Fig. 6A). Percent change in saccharin solution intake varied across time (within subjects,  $F_{2.5,173.8} = 3.674$ ,  $P = 0.019$ ) and with the time x group ( $F_{5.0,173.8} = 4.966$ ,  $P < 0.001$ ) and time x injection ( $F_{2.5,173.8} = 9.081$ ,  $P < 0.001$ ) interactions. While there was considerable variance in this measure, post hoc analyses revealed that saccharin solution intake was reduced in the LPS-treated LD-AdLib and LD-FR groups during the 0-6 h timepoint as compared to their respective saline-treated controls ( $P < 0.009$  for both comparisons).

#### *Nest building behavior*

Percent change in nesting material shredded differed among the groups from the 0-6 h ( $H = 43.543$ ,  $P < 0.001$ ), 24-30 h ( $H = 59.684$ ,  $P < 0.001$ ), and 48-54 h ( $H = 50.964$ ,  $P < 0.001$ ) timepoints but not at the 72-78 h timepoint ( $H = 4.356$ ,  $P = 0.499$ ) (Fig. 6B). Specifically, at the 0-6 h, 24-30 h, and 48-54 h timepoints, all three LPS-treated groups showed decreases in nesting material shredded as compared to their respective saline-treated controls ( $Z > 3.003$ ,  $P < 0.002$  for all comparisons); however, LPS-treated LD-FR animals showed lesser percent decreases in nesting material shredded than the LPS-treated SD-AdLib group at the 24-30 h ( $Z = 2.483$ ,  $P = 0.013$ ) and 48-54 h ( $Z = 2.037$ ,  $P = 0.042$ ) timepoints and the LPS-treated LD-AdLib group at the 24-30 h timepoint ( $Z = 2.111$ ,  $P = 0.035$ ).

#### **Blood glucose**

Blood glucose levels were affected by group ( $F_{2,69} = 3.77$ ,  $P = 0.028$ ) and injection ( $F_{1,69} = 114.23$ ,  $P < 0.001$ ) but not the group x injection interaction ( $F_{2,69} = 0.24$ ,  $P = 0.784$ ) (Fig. 7A). All LPS-treated hamsters showed lower blood glucose levels than their respective saline-treated controls ( $T > 5.75$ ,  $P < 0.001$  for all comparisons). Additionally, saline-treated LD-FR hamsters had lower blood glucose concentrations than saline-treated LD-AdLib hamsters ( $T = 2.42$ ,  $P = 0.018$ ).



## Cortisol

Cortisol was affected by group ( $F_{2,69} = 18.082$ ,  $P < 0.001$ ) and injection ( $F_{1,69} = 65.005$ ,  $P < 0.001$ ) but not the group x injection interaction ( $F_{2,69} = 0.402$ ,  $P = 0.671$ ) (Fig. 7B). LPS-treated animals from all groups showed elevated cortisol levels compared to their respective saline-treated controls ( $P < 0.001$  for all comparisons). LPS-treated LD-FR and SD-AdLib animals had higher cortisol levels than LPS-treated LD-AdLib animals ( $P < 0.02$  for both comparisons), while saline-treated LD-FR and SD-AdLib animals had higher cortisol levels than saline-treated LD-AdLib animals ( $P < 0.006$  for both comparisons). Cortisol levels of the LPS-treated LD-AdLib animals were similar to those of saline-treated LD-FR and SD-AdLib animals ( $P > 0.05$  for both comparisons).

## Tissue masses

Paired testes mass was affected by group ( $F_{2,69} = 1425.837$ ,  $P < 0.001$ ) but not by injection ( $F_{1,69} = 2.454$ ,  $P = 0.122$ ) or the group x injection interaction ( $F_{2,69} = 0.373$ ,  $P = 0.690$ ) (Table 2). Specifically, SD-AdLib hamsters had paired testes masses that were regressed in comparison to LD-AdLib and LD-FR hamsters regardless of injection treatment ( $P < 0.001$  for all comparisons). IWAT, EWAT, RWAT, and composite fat masses were affected by group ( $F_{2,69} > 15.69$ ,  $P < 0.001$  for all models), but not injection ( $F_{1,69} < 0.07$ ,  $P > 0.806$  for all models) or the group x injection interaction ( $F_{2,69} < 0.23$ ,  $P > 0.799$  for all models) (Table 2). All groups showed significantly different composite fat masses from each other, with the LD-AdLib groups having the greatest composite fat mass, followed by the LD-FR groups, and then the SD-AdLib groups ( $P < 0.02$  for all comparisons between groups).

## DISCUSSION

The results of this study demonstrate that seasonal differences in body mass alone do not regulate all variation in sickness symptoms in Siberian hamsters; however, inducing body mass loss in long-day housed hamsters does result in animals displaying some symptoms that appear more short-day-like. Specifically, long-day hamsters that were food restricted showed body mass loss in response to LPS that was attenuated in comparison to long-day *ad libitum* hamsters but comparable to short-day *ad libitum* hamsters. The attenuation of body mass loss in long-day food restricted hamsters was likely due in part to attenuation of LPS-induced anorexia, as the long-day restricted hamsters showed patterns of anorexia intermediate between the short-day and long-day *ad libitum* groups but showed the lowest percentage of

body mass loss of the three groups. We expected to see differences in the magnitude of LPS-induced decreases in nest building between the short- and long-day *ad libitum* groups; however, no differences were observed. Rather, we found that the long-day restricted group showed less of a decrease in nest building after LPS, suggesting that in this experimental context, the act of prior food restriction may have had greater impacts than photoperiod on this measure. In contrast to our predictions, the intensity of LPS-induced anhedonic behavior was not affected by food restriction, as both long-day *ad libitum* and restricted animals showed LPS-induced decreases in saccharin solution intake at 0-6 h post-injection while short-day *ad libitum* animals did not.

All three LPS-treated groups showed hypothermia, rather than fever, from 4 or 6 hours post-injection until the end of the measuring period 24 hours after injection. Hypothermic responses to sickness are not uncommon (Martin et al., 2008b; Owen-Ashley et al., 2008; Burness et al., 2010; French et al., 2013; Carlton and Demas, 2014) and can actually be beneficial to survival during severe inflammation or low energy availability (Romanovsky and Szekely, 1998). For instance, rats that receive high concentrations of endotoxin display hypothermic responses and also show decreased glucose levels compared to control-injected animals; however, rats that receive lower doses of endotoxin show fever and no hypoglycemia (Lang et al., 1985). As all three LPS-treated groups showed reduced glucose in comparison to saline-treated animals after injection, their glucose levels coupled with their hypothermic responses may suggest the animals were experiencing severe inflammation. In concordance with the photoperiodic influence on temperature, hamsters in the LPS-treated long-day *ad libitum* group had colonic temperatures that were lower than the short-day group at several timepoints, indicating that photoperiodic influences on temperature were maintained during the hypothermic response. Alternatively, the LPS-treated long-day restricted group only had temperature recordings that were lower than the LPS-treated short-day group at 8 hours post-injection, suggesting that hypothermia was attenuated in this group as compared to the LPS-treated long-day *ad libitum* group.

We assessed correlations between pre-LPS baseline body mass and the maximum percent body mass loss that was displayed after injection. We did not find a significant correlation between these measures, suggesting that intensity of energetically costly sickness symptoms may not be entirely limited by a minimum body mass threshold that the animal cannot surpass in order to survive (Ashley and Wingfield, 2012). However, there were significant correlations between pre-LPS body mass and percent body mass loss at days 3 and 4 post-LPS. Whereas maximum percent body mass loss may not be correlated with pre-LPS

body mass, correlations at days 3 and 4 post-LPS suggest that the length of time an animal can maintain body mass loss throughout sickness may be constrained by their pre-sickness body mass. In white-crowned sparrows (*Zonotrichia leucophrys*), baseline body mass is correlated with post-LPS percent decreases in body mass, with initially heavier individuals showing the greatest decreases in body mass 24 hours after LPS injection (Owen-Ashley et al., 2006; Owen-Ashley et al., 2008). The differences in timepoints at which these correlations are observed between hamsters and sparrows may reflect species differences in the amount of extra energy reserves each animal stores. For instance, if hamsters maintain greater surplus energy stores than sparrows, then the need to regulate sickness symptoms to avoid hitting a body mass where survival is risked may not occur until later into the sickness response. In the future, doing comparative studies across species with varying degrees of surplus energy stores may elucidate relationships between body mass and sickness intensity.

Because we found that long-day restricted hamsters showed attenuation of some sickness symptoms, we sought to determine what energetic hormones could be acting as intermediaries between body mass and sickness. We previously showed that seasonal variation in leptin mediates seasonal variation in LPS-induced hypothermia but not other sickness symptoms (Carlton and Demas, 2014). In the present study, we found that even though the long-day restricted group showed comparable body masses to the short-day *ad libitum* group, long-day restricted animals had higher leptin levels than short-day *ad libitum* animals. Therefore, if leptin is the primary intermediary between body mass and sickness, then we would have expected to see that sickness symptoms exhibited by the long-day restricted group were inbetween the short- and long-day *ad libitum* groups. The results of this present study are largely consistent with previous findings (Carlton and Demas, 2014), as the long-day restricted group showed an intermediate hypothermic response, exhibiting temperatures that fell inbetween those of the short-day and long-day *ad libitum* groups at several timepoints. The long-day restricted group also showed an intermediate anorexic response. While the intensity of this measure is consistent with differences in leptin levels across groups, our previous work directly manipulating leptin levels does not support the hypothesis that leptin mediates sickness-induced anorexia in Siberian hamsters (Carlton and Demas, 2014). Although some research has linked leptin with sickness-induced anorexia (Sachot et al., 2004; Harden et al., 2006), other studies have suggested that these variables have little relationship with each other (Faggioni et al., 1997; Lugarini et al., 2005). Thus, the role of leptin in modulating sickness-induced anorexia in Siberian hamsters and other species remains unresolved.

Suppression of the inflammatory response via circulating cortisol may be a promising mechanism to explain the attenuated sickness in the long-day restricted group. Glucocorticoids are released during sickness responses and are critical for regulating their intensity (Sapolsky et al., 2000). Rats that have their adrenal glands removed to prevent glucocorticoid production show greater body mass loss in response to LPS as compared to sham-operated controls (Johnson et al., 1996), while administration of synthetic glucocorticoids concurrently with LPS attenuates sickness-induced decreases in food intake (Uehara et al., 1989). Both the saline- and LPS-treated long-day restricted groups in our study exhibited elevated cortisol levels relative to their respective long-day *ad libitum* counterparts. Thus, it is possible that increased circulating cortisol levels in the long-day restricted animals may have acted to suppress immunological modulators of sickness-induced anorexia and body mass loss.

Although the long-day restricted group exhibited elevated cortisol levels relative to the long-day *ad libitum* group, both the saline-treated and LPS-treated long-day restricted groups had similar cortisol levels to their respective short-day *ad libitum* counterparts. Siberian hamsters show increased circulating cortisol levels in short days as compared to long days (Bilbo and Nelson, 2003; Ashley et al., 2013; Carlton and Demas, 2014). Therefore, it is possible that increased cortisol levels may be facilitating the attenuation of sickness symptoms in short-day animals. Previous studies have investigated the effects of melatonin, testosterone, and leptin on seasonal variation in sickness intensity, but none have identified a seasonally modulated hormone that explains the majority of sickness response variation in this species (Bilbo and Nelson, 2002; Wen et al., 2007; Prendergast et al., 2008; Carlton and Demas, 2014). In addition, there may also be seasonal changes in glucocorticoid receptors or binding proteins in this species that may affect regulation of sickness responses. Although no studies have explored seasonal variation in glucocorticoid receptors and proteins in Siberian hamsters, there is evidence that they vary seasonally in other species and that seasonal variation in receptors can occur within immune tissues (Romero et al., 2006; Lattin et al., 2013). Thus, examining the roles that seasonal variation in glucocorticoid mechanism play in this phenomenon may be a promising next step.

While short-day hamsters displayed increased cortisol levels with *ad libitum* food access, we had to food restrict long-day hamsters to achieve the same levels. Sustained moderate food restriction has been shown to increase cortisol levels in Siberian hamsters (Bilbo and Nelson, 2004; Zysling et al., 2009). Corticosterone is elevated to higher levels after LPS injection in food restricted mice and rats than in non-food restricted animals, and its

elevation corresponds with lower levels of proinflammatory cytokines (Matsuzaki et al., 2001; MacDonald et al., 2014). Thus, it is possible that increased cortisol levels generated by food restriction may be suppressing proinflammatory cytokines in long-day restricted hamsters in this study.

It cannot be ignored that although we induced body mass loss in the long-day restricted group so that it mimicked natural short-day body mass loss, this pattern of body mass loss in long-day animals would likely be interpreted by the brain and periphery as “seasonally inappropriate” (Mercer et al., 2001). Differences in neural interpretation of energetic state between the long-day restricted and short-day *ad libitum* groups may explain why the long-day restricted group showed attenuated body mass loss in response to LPS as compared to the short-day group, despite exhibiting a longer duration of LPS-induced anorexia. It is possible that food restriction resulted in a slowing of metabolic rate in long-day restricted animals. Syrian hamsters (*Mesocricetus auratus*) recover from short-term food restriction by slowing down their resting metabolic rates, rather than increasing food consumption over normal pre-restriction levels (Borer et al., 1985). As Siberian hamsters also do not recover from energy deficit by increasing food consumption (Bartness and Clein, 1994), long-day restricted animals in this current study may have had reduced metabolic rates as well. Even though the long-day restricted group may have shown greater intensity of LPS-induced anorexia than the short-day *ad libitum* group, if their metabolic rates were slower, they could have exhibited reduced body mass loss. The food restriction treatment may also explain why the long-day food restricted group displayed lesser decreases in nest building. Having access to a nest decreases food intake in Siberian hamsters housed in low temperatures by 18%, suggesting that nesting is an energy conservation strategy (Kauffman et al., 2003). Although the long-day food restricted group was provided with access to 100% of their pre-restriction mean food intake, they may have still been in energy conservation mode, explaining why they did not decrease nest building as much as the two other groups.

In conclusion, our data show that food restricting long-day Siberian hamsters to mimic short-day body mass loss results in the attenuation of some sickness symptoms, rendering them more short-day like. However, our results do not provide conclusive evidence that all seasonal variation in sickness intensity can be attributed to seasonal changes in energy stores, as the intensity of some symptoms remained unchanged or intermediate between those of the short- and long-day *ad libitum* groups. One promising mediator of seasonal variation in sickness intensity may be glucocorticoids, as glucocorticoids act to suppress sickness and can vary both seasonally and with food restriction. Future work should target understanding the

role of glucocorticoids in modulating seasonal sickness responses and work toward understanding how natural variation in energy stores within and across species and seasons contribute to sickness intensity.

## **MATERIALS AND METHODS**

### **Animals and housing conditions**

Adult male (> 60 days of age; average age = 156 days) Siberian hamsters (n = 90) were obtained from our breeding colony at Indiana University. All animals were initially group housed (2-5 per cage with same sex siblings on weaning at 17-18 days of age) in long-day photoperiods (light:dark (L:D) 16:8), and then individually housed in polypropylene cages (27.8 x 17.5 x 13.0 cm) for one week prior to experimental housing. Food (Laboratory Rodent Diet 5001, LabDiet, St. Louis, MO, USA) and water were available *ad libitum* prior to the start of the experiment. Temperature ( $20 \pm 2^\circ\text{C}$ ) and humidity ( $50 \pm 10\%$ ) were maintained at constant levels. All animal methods were reviewed and approved by the Institutional Animal Care and Use Committee at Indiana University.

### **Experimental methods**

Animals were assigned to one of three groups matched for initial body mass. The first group was housed in short days (L:D 8:16) and was fed *ad libitum* throughout the entire experiment (SD-AdLib; n = 46). Measures of body mass (to the nearest 0.1 g) and food consumption (to the nearest 0.1 g) were collected every other day for 10 weeks to track short-day induced changes in body mass and food intake and photoperiodic responsiveness to short days (described below). Food intake was assessed by weighing the food pellets remaining in the hopper each day.

The second and third groups were housed in long days (L:D 16:8) for the length of the experiment. The second group was fed *ad libitum* throughout the entire experiment (LD-AdLib; n = 20). Body mass and food intake were measured every other day for 10 weeks. The third group was provided *ad libitum* access to food for the first 10 days and then food restricted for the following 60 days (LD-FR; n = 24). During the first 10 days, body mass and food intake was measured every other day to establish pre-restriction mean values for these measures. During the next 60 days, these animals were allocated a pre-measured amount of food each day at the start of their active dark phase (1600 h) that ranged in quantities from 65-100% of the animal's pre-restriction mean food intake (Mauer and Bartness, 1997). Body mass was recorded every other day for this group, and food access was adjusted in to keep the



LD-FR group mean body mass tracking the SD-AdLib group mean. We modulated food availability to the LD-FR group to target the pattern of body mass loss in the SD-AdLib group, rather than providing food quantities that were pair matched to SD-AdLib food intake, because body mass loss in short days is both food intake dependent and independent (Wade and Bartness, 1984).

The SD-AdLib group was housed in experimental conditions six weeks prior to the LD-AdLib and LD-FR groups because a subset of hamsters housed in short days fails to show reproductive responsiveness to prolonged exposure to this photoperiod (i.e., do not display gonadal regression or reductions in body mass and fat stores). These individuals are referred to as photoperiodic non-responders (Puchalski and Lynch, 1986). Because we wanted to directly match body mass loss of the SD-AdLib and LD-FR groups, we needed to exclude the photoperiodic non-responders from our calculations of the SD-AdLib body mass loss trajectory (Mauer and Bartness, 1997). By observing body mass loss patterns in the short-day hamsters during the six weeks prior to housing the LD-FR group, we could remove animals who were not losing weight (and were likely photoperiodic non-responders) from the SD-AdLib body mass group means. Paired testes mass was collected at the end of the experiment in order to confirm short-day responsiveness (defined as a paired testes mass < 0.15 g) (Greives et al., 2008). Twelve animals were determined to be photoperiodic non-responders and removed from the experiment.

Starting on experimental day 70 for each group, body mass and food intake measurements were collected daily for the next 5 days to establish pre-injection baseline values for these measures. During these 5 days, at the start of the dark phase, LD-FR animals were provided daily food allocations equal to 100% of their pre-restriction means in order to relieve the effects of food restriction but not result in excessive food hoarding. After periods of food restriction, Siberian hamsters do not increase their food intake above normal levels when provided *ad libitum* access to food but do increase food hoarding (Bartness and Clein, 1994). In order to avoid complications with increased hoarding, we only provided hamsters access to their normal food intake rather than access to excess food that would be hoarded rather than consumed.

On the fifth day of baseline measurement collection, half of the animals in each group were injected intraperitoneally (i.p.) ~15 minutes before the onset of darkness with 25 µg LPS (LPS from *Salmonella enterica* serotype typhimurium, Sigma-Aldrich, St. Louis, MO, USA; Carlton and Demas, 2014) suspended in 0.1 ml sterile 0.9% saline. The remaining

animals were injected i.p. with 0.1 ml sterile 0.9% saline. Sickness responses were assessed throughout the four days following injections.

### **Sickness response measurements**

#### *Fever, body mass loss, anorexia*

Colonic temperatures (to the nearest 0.1°C) were collected immediately before injection and 2, 4, 6, 8, 10, 12, 16, 20, and 24 h after injection using a MicroTherma 2T thermometer (ThermoWorks, Alpine, UT, USA) and a lubricated RET-3-ISO thermocouple probe (Physitemp Instruments, Inc., Clifton, NJ, USA) inserted ~12 mm into the rectum. To assess body mass loss and anorexia, daily body mass and food intake measurements continued until the end of the study. Hamsters in the SD-AdLib and LD-AdLib groups received *ad libitum* access to food until the end of the experiment, while hamsters in the LD-FR group continued to receive daily food allocations equal to 100% of their pre-restriction mean values.

#### *Hedonic behavior*

To assess the effects of our treatments on hedonic behavior, we provided hamsters with a highly palatable sodium saccharin solution (Baillie and Prendergast, 2008). Saccharin is a non-caloric artificial sweetener. As such, differences in ingestion between the groups would not interfere with our abilities to control energy intake. Beginning 5 days before injection, for the first 6 h of the dark phase (1600 h to 2200 h) hamsters were provided with a fluid bottle containing a solution of 0.1% sodium saccharin (saccharin sodium salt hydrate, Sigma-Aldrich, St. Louis, MO, USA) dissolved in tap water (Baillie and Prendergast, 2008). The saccharin solution bottles were weighed (to the nearest 0.1 g) before they were given and after they were collected from the hamsters each day. Presentation of saccharin solution continued daily through day 3 post-injection.

#### *Nest building behavior*

To assess the effects of our treatments on thermoregulatory behavior, beginning five days before injection, each hamster was provided with a compressed cotton nestlet weighing ~2.5 g (Ancare, Bellmore, NY, USA) for the first 6 h of the dark phase (Baillie and Prendergast, 2008). The nestlet was weighed (to the nearest 0.1 g) before presentation, and the unshredded portion was weighed after presentation. When provided a nestlet, hamsters quickly start shredding the cotton to build a nest. Nest building is an adaptive behavior to



enhance energy conservation in low temperatures, however, hamsters readily build nests in room temperature (20-23°C) (Puchalski et al., 1988). Presentation of nestlets continued daily through day 3 post-injection.

### **Blood sampling and necropsies**

Blood samples (~250 µl) were drawn from each animal 4 h after the onset of darkness at two time points (three days before injection and on the day of injection) to assess circulating blood glucose, leptin, and cortisol concentrations. Briefly, animals were lightly anesthetized with isoflurane vapors, and blood samples were drawn from the retro-orbital sinus. Blood samples were allowed to clot at room temperature for 1 h, clots were removed, and samples were centrifuged at 4°C for 30 min at 2500 rpm. Serum aliquots were aspirated and stored in sealable polypropylene microcentrifuge tubes at -20°C until assayed. All blood samples were collected within 3 min of initial handling. Animals were euthanized five days after LPS injection and necropsies were performed. Testes, inguinal white adipose tissue (IWAT), epididymal WAT (EWAT), and retroperitoneal WAT (RWAT) were removed, cleaned of connective tissues, and weighed to the nearest 0.1 mg. A composite adipose tissue score was calculated by summing the individual WAT pad masses.

### **Blood glucose measurement**

Blood glucose was measured from the samples collected 4 hours after injection. Immediately upon collection, ~5 µl of whole blood was transferred onto test strips of a blood glucose monitoring system (ReliOn, Micro Blood Glucose Monitoring System, Arkray USA, Inc., Minneapolis, MN, USA), and the readout was recorded. The meter was previously calibrated using an internal standard provided by the manufacturer.

### **Leptin enzyme-linked immunosorbent assay (ELISA)**

We assessed circulating leptin levels in the samples collected three days prior to injection to determine if the groups showed differing serum concentrations of this hormone. Leptin levels were assayed via commercially prepared mouse leptin ELISA kits (Crystal Chem, Downers Grove, IL, USA). This kit has previously been validated in Siberian hamsters (Carlton and Demas, 2014). Samples were diluted 1:4 and run in duplicate. Intra-assay variabilities were 6.8%, 12.5%, and 1.8%.

### **Cortisol enzyme immunoassay (EIA)**

We assessed circulating cortisol levels to determine if the groups differed in the magnitude of baseline and LPS-induced activation of the HPA axis. Cortisol is the predominant glucocorticoid in Siberian hamsters (Reburn and Wynne-Edwards, 2000). Serum cortisol concentrations were determined in multiple EIAs from a commercially prepared kit (Enzo Life Sciences, Inc., Farmingdale, NY, USA). This assay was previously validated for use in Siberian hamsters (Demas et al., 2004). Samples were diluted to 1:80 with assay buffer and run in duplicate. Intra-assay variabilities were 3.1%, 0%, and 0.6%.

### **Statistical analyses**

All statistics were performed using JMP 10 (SAS Institute Inc., Cary, NC, USA). Residuals were checked for normality and homogeneity of variance, and those data that were non-normally distributed were transformed with the function that best fit the data. Three animals were excluded from the final analyses: one from the saline-treated SD-AdLib group because it exhibited sickness symptoms despite receiving no LPS, one from the LPS-treated LD-AdLib group because it showed abnormal body mass loss despite no food restriction, and one from the saline-treated LD-AdLib group because it displayed abnormal food hoarding. The final sample sizes were as follows: SD-AdLib-Saline (n = 16), SD-AdLib-LPS (n=17), LD-AdLib-Saline (n=9), LD-AdLib-LPS (n=9), LD-FR-Saline (n=12), LD-FR-LPS (n=12).

Pre-injection baseline values were calculated for body mass, food intake, saccharin solution intake, and percent nesting material shredded by averaging the three daily measurements immediately prior to injections (days 72-74). We did not include days 70-71 in this mean because measures on these days were more variable as animals were adjusting to changes in food allocations and the presence of saccharin solution and nestlets. To determine if there were group effects on pre-injection baseline body mass, baseline food intake, leptin levels, and baseline saccharin solution intake, one-way analyses of variance (ANOVA) were performed. Pre-injection baseline saccharin solution intake was log transformed and leptin concentration was square root transformed. Pre-injection baseline percent nesting material shredded could not be transformed to meet the assumptions of normality, so a Kruskal-Wallis test was performed.

Because group affected pre-injection food intake, body mass, saccharin solution intake, and percent nesting material shredded (see Results), post-injection changes in these measurements were expressed as percentages of each animal's baseline values. Repeated measures ANOVAs were performed on post-injection percent changes in food intake, body

mass, and saccharin solution intake and colonic temperature. The within-subject comparisons for percent change in body mass, colonic temperature, and percent change in saccharin solution intake violated the assumptions of sphericity and were Greenhouse-Geisser corrected. Post-injection percent change in saccharin solution intake was square root transformed. Post-injection changes in percent nesting material shredded could not be transformed to meet the assumptions of normality, so a Kruskal-Wallis test was performed. Differences in glucose, cortisol, and tissue masses among the groups were assessed with two-way ANOVAs. Glucose was square root transformed, while cortisol and the tissue masses were log transformed. Correlations between pre-injection baseline body mass and percent changes in body mass were assessed for LPS-treated animals using analyses of covariance (ANCOVA). Post-hoc comparisons were conducted using Fisher's Least Significant Difference tests when ANOVAs were statistically significant.

### **Acknowledgments**

We thank Nikki Rendon, Allison Bailey, Kristyn Sylvia, and Andrea Amez for help with experimental procedures. Thanks to the Indiana University animal care staff for excellent animal care.

### **Competing interests**

None to declare.

### **Author contributions**

EDC contributed to project design, data collection and analysis, interpretation of results, and manuscript writing. GED contributed to project design and provided comments on the manuscript.

### **Funding**

This work was supported by a National Science Foundation (NSF) Graduate Research Fellowship, a National Institutes of Health T32 training grant (HD049336), and a NSF Doctoral Dissertation Improvement Grant (IOS-1310749) to EDC and NSF IOS-0919911 to GED.

## References

- Adelman, J. S. and Martin, L. B.** (2009). Vertebrate sickness behaviors: Adaptive and integrated neuroendocrine immune responses. *Integr Comp Biol* **49**, 202-214.
- Ashley, N. T. and Wingfield, J. C.** (2012). Sickness Behavior in Vertebrates: Allostasis, Life-History Modulation, and Hormonal Regulation. In *Ecoimmunology*, eds. G. E. Demas and R. J. Nelson), pp. 45-91. New York: Oxford University Press.
- Ashley, N. T., Walton, J. C., Haim, A., Zhang, N., Prince, L. A., Fruchey, A. M., Lieberman, R. A., Weil, Z. M., Magalang, U. J. and Nelson, R. J.** (2013). Sleep deprivation attenuates endotoxin-induced cytokine gene expression independent of day length and circulating cortisol in male Siberian hamsters (*Phodopus sungorus*). *J Exp Biol* **216**, 2581-2586.
- Baillie, S. R. and Prendergast, B. J.** (2008). Photoperiodic regulation of behavioral responses to bacterial and viral mimetics: a test of the winter immunoenhancement hypothesis. *Journal of biological rhythms* **23**, 81-90.
- Bartness, T. J. and Klein, M. R.** (1994). Effects of food deprivation and restriction, and metabolic blockers on food hoarding in Siberian hamsters. *The American journal of physiology* **266**, R1111-1117.
- Bilbo, S. D. and Nelson, R. J.** (2002). Melatonin regulates energy balance and attenuates fever in Siberian hamsters. *Endocrinology* **143**, 2527-2533.
- Bilbo, S. D. and Nelson, R. J.** (2003). Sex differences in photoperiodic and stress-induced enhancement of immune function in Siberian hamsters. *Brain, behavior, and immunity* **17**, 462-472.
- Bilbo, S. D. and Nelson, R. J.** (2004). Photoperiod influences the effects of exercise and food restriction on an antigen-specific immune response in Siberian hamsters. *Endocrinology* **145**, 556-564.
- Bilbo, S. D., Drazen, D. L., Quan, N., He, L. and Nelson, R. J.** (2002). Short day lengths attenuate the symptoms of infection in Siberian hamsters. *Proceedings. Biological sciences / The Royal Society* **269**, 447-454.
- Borer, K. T., Allen, E. R., Smalley, R. E., Lundell, L. and Stockton, J.** (1985). Recovery from energy deficit in golden hamsters. *The American journal of physiology* **248**, R439-446.
- Burness, G., Armstrong, C., Fee, T. and Tilman-Schindel, E.** (2010). Is there an energetic-based trade-off between thermoregulation and the acute phase response in zebra finches? *Journal of Experimental Biology* **213**, 1386-1394.
- Carlton, E. D. and Demas, G. E.** (2014). Leptin mediates seasonal variation in some but not all symptoms of sickness in Siberian hamsters. *Horm Behav* **66**, 802-811.
- Carlton, E. D., Demas, G. E. and French, S. S.** (2012). Leptin, a neuroendocrine mediator of immune responses, inflammation, and sickness behaviors. *Horm Behav* **62**, 272-279.

**Concannon, P., Levac, K., Rawson, R., Tennant, B. and Bensadoun, A.** (2001). Seasonal changes in serum leptin, food intake, and body weight in photoentrained woodchucks. *American journal of physiology. Regulatory, integrative and comparative physiology* **281**, R951-959.

**Demas, G. E. and Nelson, R. J.** (1998). Photoperiod, ambient temperature, and food availability interact to affect reproductive and immune function in adult male deer mice (*Peromyscus maniculatus*). *J Biol Rhythms* **13**, 253-262.

**Demas, G. E., Johnson, C. and Polacek, K. M.** (2004). Social interactions differentially affect reproductive and immune responses of Siberian hamsters. *Physiology & behavior* **83**, 73-79.

**Faggioni, R., Fuller, J., Moser, A., Feingold, K. R. and Grunfeld, C.** (1997). LPS-induced anorexia in leptin-deficient (*ob/ob*) and leptin receptor-deficient (*db/db*) mice. *The American journal of physiology* **273**, R181-186.

**Freeman, D. A., Kampf-Lassin, A., Galang, J., Wen, J. C. and Prendergast, B. J.** (2007). Melatonin acts at the suprachiasmatic nucleus to attenuate behavioral symptoms of infection. *Behavioral Neuroscience* **121**, 689-697.

**French, S. S., Chester, E. M. and Demas, G. E.** (2013). Maternal immune activation affects litter success, size and neuroendocrine responses related to behavior in adult offspring. *Physiology & behavior* **119**, 175-184.

**Gaspar-Lopez, E., Casabiell, J., Estevez, J. A., Landete-Castillejos, T., De La Cruz, L. F., Gallego, L. and Garcia, A. J.** (2009). Seasonal changes in plasma leptin concentration related to antler cycle in Iberian red deer stags. *Journal of comparative physiology. B, Biochemical, systemic, and environmental physiology* **179**, 617-622.

**Greives, T. J., Kriegsfeld, L. J. and Demas, G. E.** (2008). Exogenous kisspeptin does not alter photoperiod-induced gonadal regression in Siberian hamsters (*Phodopus sungorus*). *Gen Comp Endocrinol* **156**, 552-558.

**Harden, L. M., du Plessis, I., Poole, S. and Laburn, H. P.** (2006). Interleukin-6 and leptin mediate lipopolysaccharide-induced fever and sickness behavior. *Physiology & behavior* **89**, 146-155.

**Hart, B. L.** (1988). Biological basis of the behavior of sick animals. *Neuroscience and biobehavioral reviews* **12**, 123-137.

**Horton, T. H., Buxton, O. M., Losee-Olson, S. and Turek, F. W.** (2000). Twenty-four-hour profiles of serum leptin in siberian and golden hamsters: photoperiodic and diurnal variations. *Horm Behav* **37**, 388-398.

**Johnson, M. S., Onorato, D. P., Gower, B. A. and Nagy, T. R.** (2004). Weight change affects serum leptin and corticosterone in the collared lemming. *Gen Comp Endocrinol* **136**, 30-36.

**Johnson, R. W., Propes, M. J. and Shavit, Y.** (1996). Corticosterone modulates behavioral and metabolic effects of lipopolysaccharide. *The American journal of physiology* **270**, R192-198.

**Kauffman, A. S., Paul, M. J., Butler, M. P. and Zucker, I.** (2003). Huddling, locomotor, and nest-building behaviors of furred and furless Siberian hamsters. *Physiology & behavior* **79**, 247-256.

**Kluger, M. J., Ringler, D. H. and Anver, M. R.** (1975). Fever and survival. *Science* **188**, 166-168.

**Lang, C. H., Bagby, G. J. and Spitzer, J. J.** (1985). Glucose kinetics and body temperature after lethal and nonlethal doses of endotoxin. *The American journal of physiology* **248**, R471-478.

**Lattin, C. R., Waldron-Francis, K. and Romero, L. M.** (2013). Intracellular glucocorticoid receptors in spleen, but not skin, vary seasonally in wild house sparrows (*Passer domesticus*). *Proceedings. Biological sciences / The Royal Society* **280**, 20123033.

**Lochmiller, R. L. and Deerenberg, C.** (2000). Trade-offs in evolutionary immunology: just what is the cost of immunity? *Oikos* **88**, 87-98.

**Lugarini, F., Hrupka, B. J., Schwartz, G. J., Plata-Salaman, C. R. and Langhans, W.** (2005). Acute and chronic administration of immunomodulators induces anorexia in Zucker rats. *Physiology & behavior* **84**, 165-173.

**MacDonald, L., Hazi, A., Paolini, A. G. and Kent, S.** (2014). Calorie restriction dose-dependently abates lipopolysaccharide-induced fever, sickness behavior, and circulating interleukin-6 while increasing corticosterone. *Brain, behavior, and immunity* **40**, 18-26.

**Maffei, M., Halaas, J., Ravussin, E., Pratley, R. E., Lee, G. H., Zhang, Y., Fei, H., Kim, S., Lallone, R., Ranganathan, S. et al.** (1995). Leptin levels in human and rodent: measurement of plasma leptin and ob RNA in obese and weight-reduced subjects. *Nature medicine* **1**, 1155-1161.

**Martin, L. B., Weil, Z. M. and Nelson, R. J.** (2008a). Seasonal changes in vertebrate immune activity: mediation by physiological trade-offs. *Philosophical transactions of the Royal Society of London. Series B, Biological sciences* **363**, 321-339.

**Martin, L. B., Weil, Z. M. and Nelson, R. J.** (2008b). Fever and sickness behaviour vary among congeneric rodents. *Funct Ecol* **22**, 68-77.

**Matsuzaki, J., Kuwamura, M., Yamaji, R., Inui, H. and Nakano, Y.** (2001). Inflammatory responses to lipopolysaccharide are suppressed in 40% energy-restricted mice. *The Journal of nutrition* **131**, 2139-2144.

**Mauer, M. M. and Bartness, T. J.** (1997). Short-day-like body weight changes do not prevent fat pad compensation after lipectomy in Siberian hamsters.

**Mercer, J. G., Moar, K. M., Logie, T. J., Findlay, P. A., Adam, C. L. and Morgan, P. J.** (2001). Seasonally inappropriate body weight induced by food restriction: effect on hypothalamic gene expression in male Siberian hamsters. *Endocrinology* **142**, 4173-4181.

**Murray, M. J. and Murray, A. B.** (1979). Anorexia of Infection as a Mechanism of Host Defense - Reply. *American Journal of Clinical Nutrition* **32**, 2168-2168.



**Owen-Ashley, N. T. and Wingfield, J. C.** (2006). Seasonal modulation of sickness behavior in free-living northwestern song sparrows (*Melospiza melodia morphna*). *J Exp Biol* **209**, 3062-3070.

**Owen-Ashley, N. T., Turner, M., Hahn, T. P. and Wingfield, J. C.** (2006). Hormonal, behavioral, and thermoregulatory responses to bacterial lipopolysaccharide in captive and free-living white-crowned sparrows (*Zonotrichia leucophrys gambelii*). *Horm Behav* **49**, 15-29.

**Owen-Ashley, N. T., Hasselquist, D., Raberg, L. and Wingfield, J. C.** (2008). Latitudinal variation of immune defense and sickness behavior in the white-crowned sparrow (*Zonotrichia leucophrys*). *Brain, behavior, and immunity* **22**, 614-625.

**Prendergast, B. J., Baillie, S. R. and Dhabhar, F. S.** (2008). Gonadal hormone-dependent and -independent regulation of immune function by photoperiod in Siberian hamsters. *American journal of physiology. Regulatory, integrative and comparative physiology* **294**, R384-392.

**Puchalski, W. and Lynch, G. R.** (1986). Evidence for differences in the circadian organization of hamsters exposed to short day photoperiod. *Journal of comparative physiology. A, Sensory, neural, and behavioral physiology* **159**, 7-11.

**Puchalski, W., Bulova, S. J., Lynch, C. B. and Lynch, G. R.** (1988). Photoperiod, temperature and melatonin effects on thermoregulatory behavior in Djungarian hamsters. *Physiology & behavior* **42**, 173-182.

**Reburn, C. J. and Wynne-Edwards, K. E.** (2000). Cortisol and prolactin concentrations during repeated blood sample collection from freely moving, mouse-sized mammals (*Phodopus* spp.). *Comparative medicine* **50**, 184-198.

**Romanovsky, A. A. and Szekely, M.** (1998). Fever and hypothermia: two adaptive thermoregulatory responses to systemic inflammation. *Med Hypotheses* **50**, 219-226.

**Romero, L. M., Cyr, N. E. and Romero, R. C.** (2006). Corticosterone responses change seasonally in free-living house sparrows (*Passer domesticus*). *Gen Comp Endocrinol* **149**, 58-65.

**Sachot, C., Poole, S. and Luheshi, G. N.** (2004). Circulating leptin mediates lipopolysaccharide-induced anorexia and fever in rats. *The Journal of physiology* **561**, 263-272.

**Sapolsky, R. M., Romero, L. M. and Munck, A. U.** (2000). How do glucocorticoids influence stress responses? Integrating permissive, suppressive, stimulatory, and preparative actions. *Endocr Rev* **21**, 55-89.

**Sheldon, B. C. and Verhulst, S.** (1996). Ecological immunology: Costly parasite defences and trade-offs in evolutionary ecology. *Trends in ecology & evolution* **11**, 317-321.

**Tizard, I.** (2008). Sickness behavior, its mechanisms and significance. *Animal health research reviews / Conference of Research Workers in Animal Diseases* **9**, 87-99.

Uehara, A., Sekiya, C., Takasugi, Y., Namiki, M. and Arimura, A. (1989). Anorexia Induced by Interleukin-1 - Involvement of Corticotropin-Releasing Factor. *American Journal of Physiology* **257**, R613-R617.

Vaughn, L. K., Veale, W. L. and Cooper, K. E. (1980). Antipyresis: its effect on mortality rate of bacterially infected rabbits. *Brain research bulletin* **5**, 69-73.

Wade, G. N. and Bartness, T. J. (1984). Effects of photoperiod and gonadectomy on food intake, body weight, and body composition in Siberian hamsters. *The American journal of physiology* **246**, R26-30.

Wen, J. C. and Prendergast, B. J. (2007). Photoperiodic regulation of behavioral responsiveness to proinflammatory cytokines. *Physiology & behavior* **90**, 717-725.

Wen, J. C., Dhabhar, F. S. and Prendergast, B. J. (2007). Pineal-dependent and -independent effects of photoperiod on immune function in Siberian hamsters (*Phodopus sungorus*). *Horm Behav* **51**, 31-39.

Zysling, D. A., Garst, A. D. and Demas, G. E. (2009). Photoperiod and food restriction differentially affect reproductive and immune responses in Siberian hamsters *Phodopus sungorus*. *Funct Ecol* **23**, 979-988.

## Figures

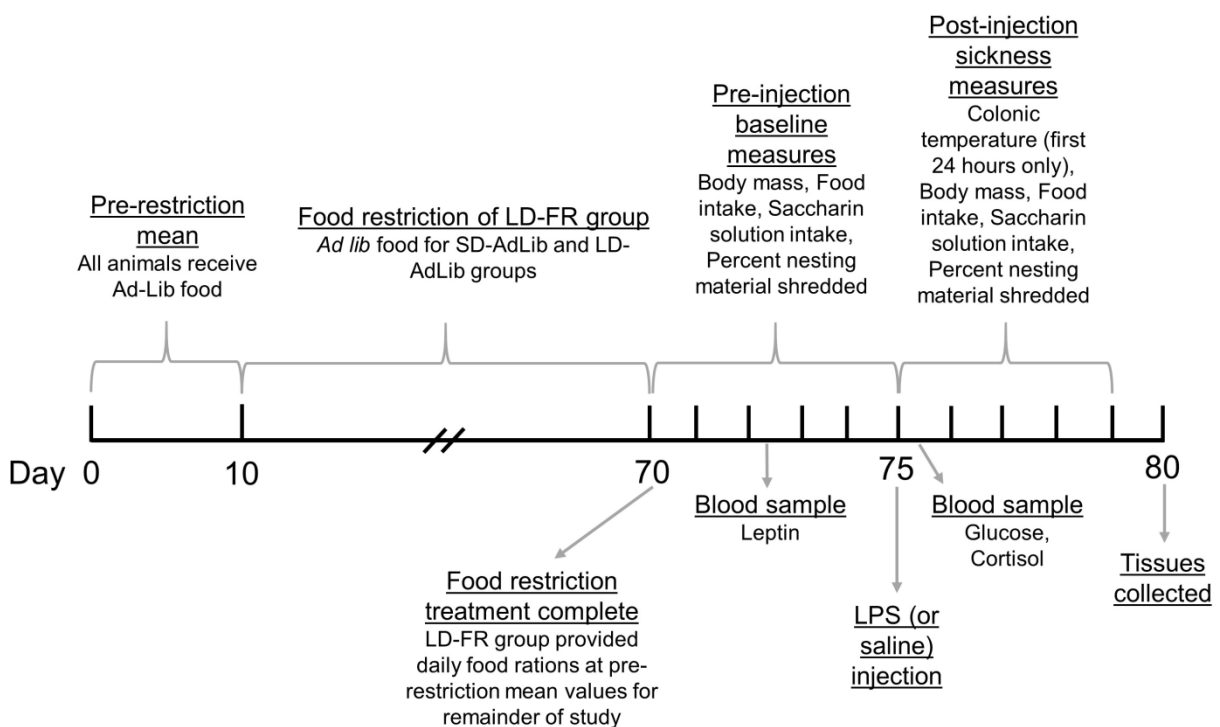

**Fig. 1. Experimental timeline indicating when treatments were performed and when measures were collected.** Day 0 refers to the timepoint when each group was housed in their experimental photoperiods, after one week of acclimation to individual housing.



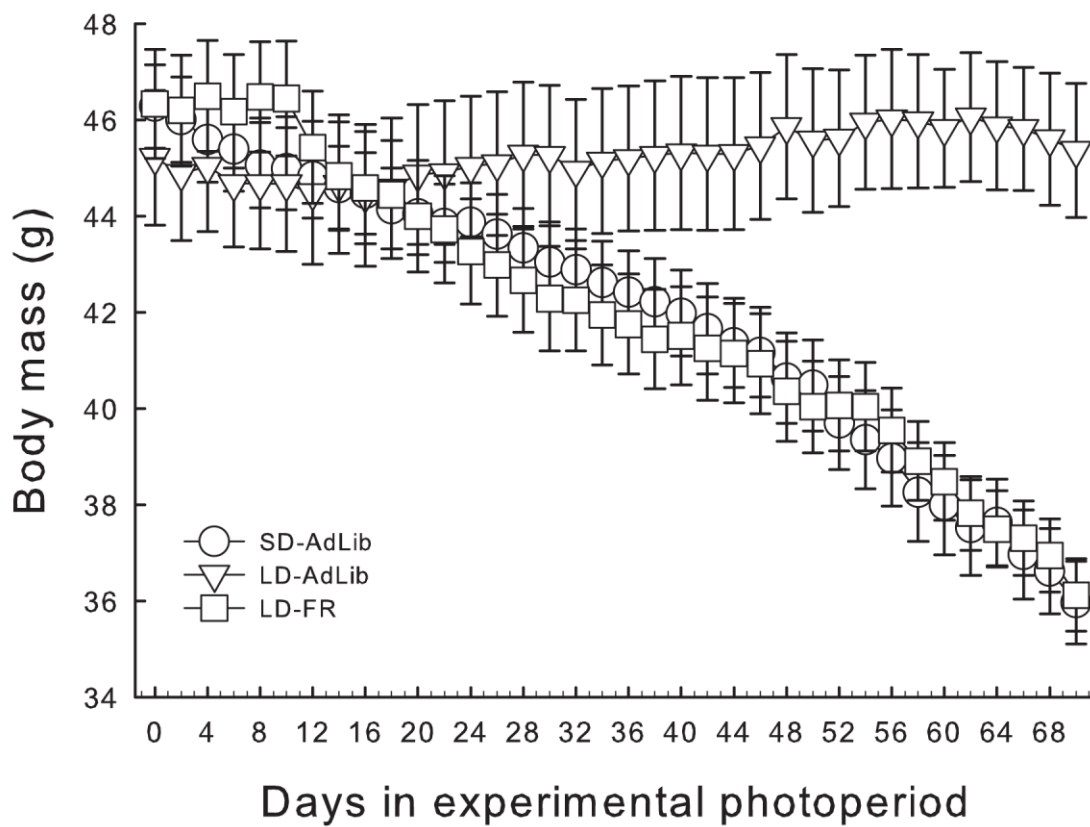

**Fig. 2. Mean ( $\pm$  SEM) body mass of male Siberian hamsters over the course of the first 70 days of experimental housing.** Hamsters were either allowed *ad libitum* access to food during the experiment and housed in short- (SD-AdLib) or long-day (LD-AdLib) photoperiods or provided restricted access to food and housed in long-day photoperiod (LD-FR).

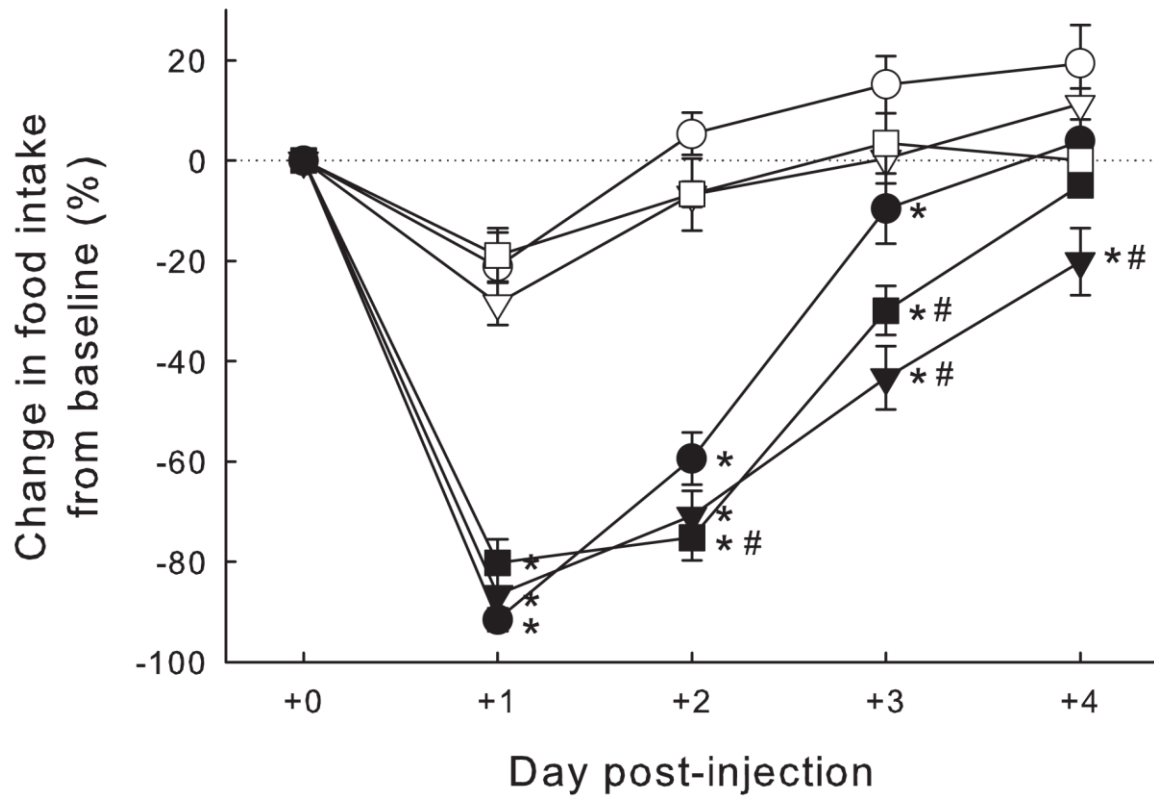

**Fig. 3.** Mean ( $\pm$  SEM) percent change in daily food intake from baseline following LPS (black icons) or saline (white icons) treatment delivered on day 0 in short-day *ad libitum* fed (SD-AdLib, ●), long-day *ad libitum* fed (LD-AdLib, ▲), and long-day (previously) food restricted (LD-FR, ■) male Siberian hamsters. Day +1 represents the time period from 0-24 h after LPS or saline injection, Day +2 represents the time period from 24-48 h after LPS or saline injection, and so forth. \* $P < 0.05$  versus saline-treated group exposed to the same photoperiod and food treatments. # $P < 0.05$  versus SD-AdLib LPS-treated group.

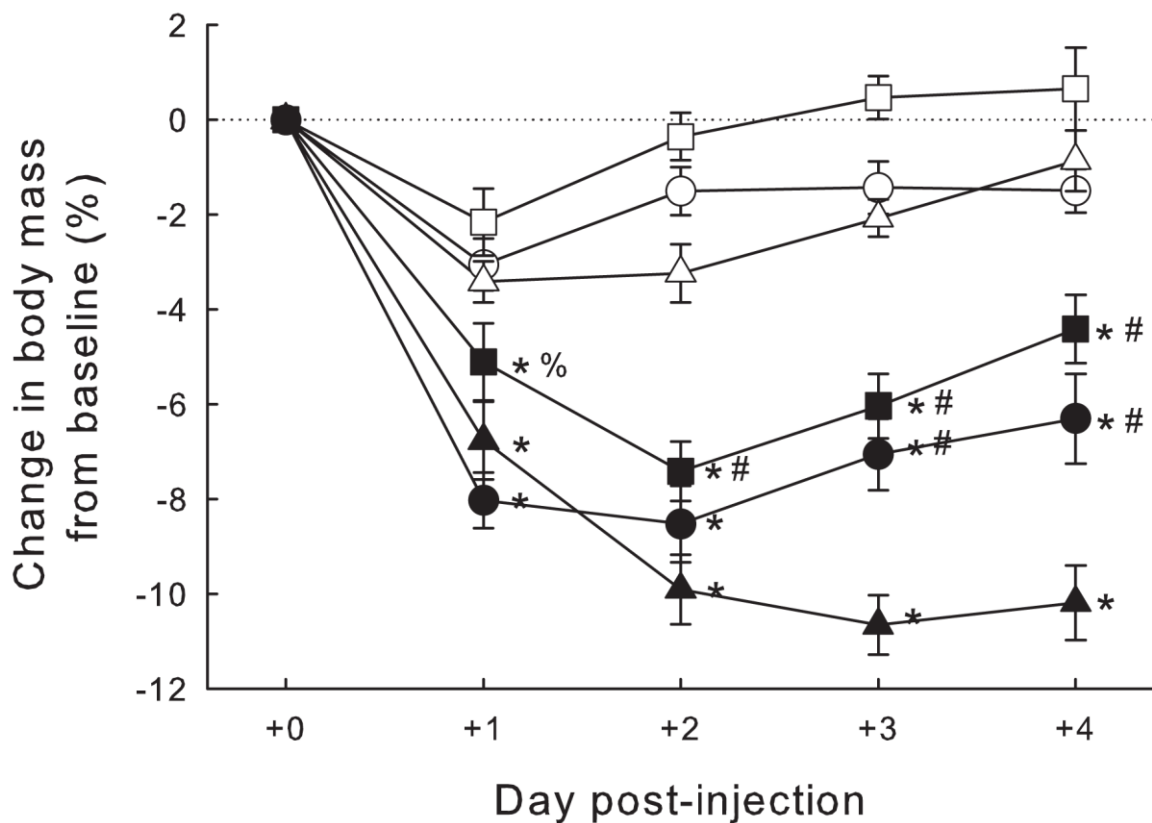

**Fig. 4.** Mean ( $\pm$  SEM) percent change in body mass from baseline following LPS (black icons) or saline (white icons) treatment delivered on day 0 in short-day *ad libitum* fed (SD-AdLib, ●), long-day *ad libitum* fed (LD-AdLib, ▲), and long-day (previously) food restricted (LD-FR, ■) male Siberian hamsters. Day +1 represents the time period from 0-24 h after LPS or saline injection, Day +2 represents the time period from 24-48 h after LPS or saline injection, and so forth. \* $P < 0.05$  versus saline-treated group exposed to the same photoperiod and food treatments. # $P < 0.05$  versus LD-AdLib LPS-treated group. % $P < 0.05$  versus SD-AdLib LPS-treated group.

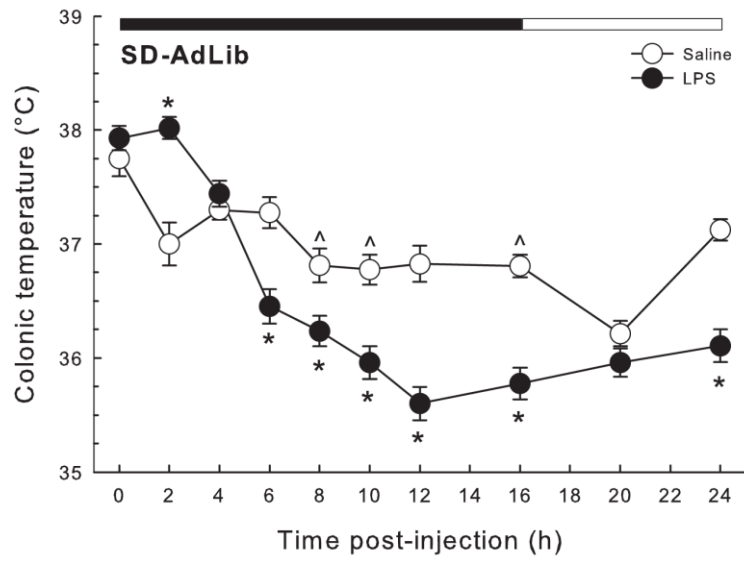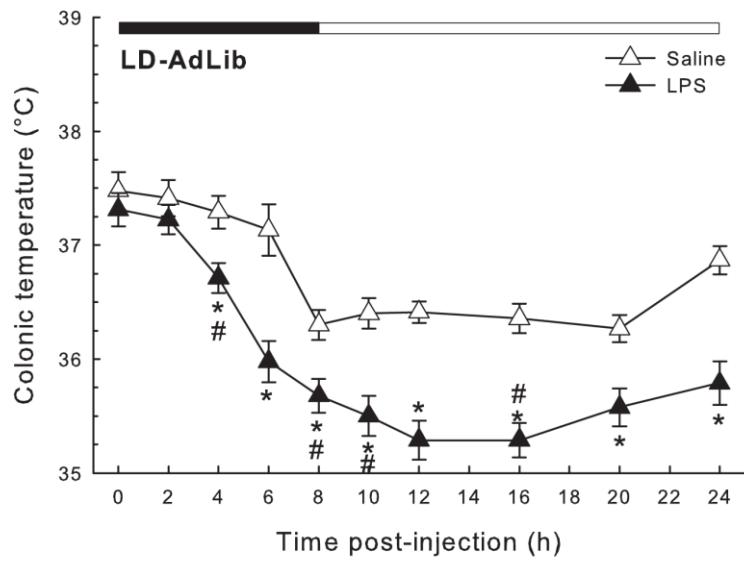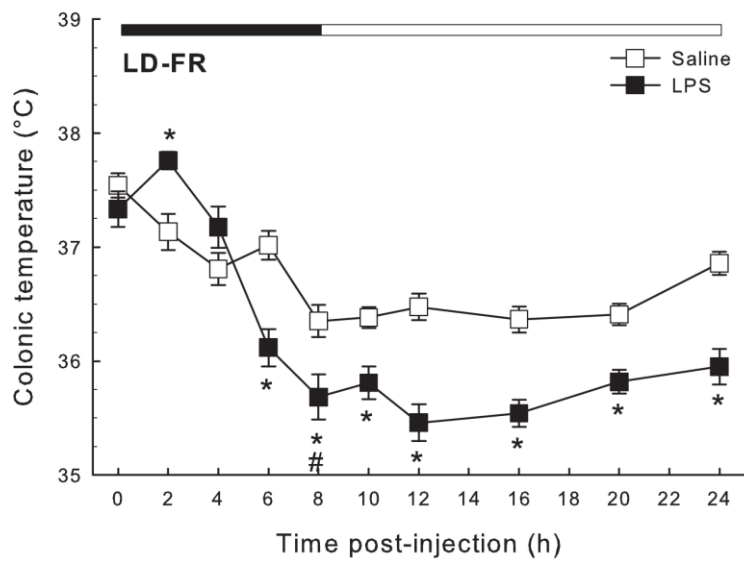

**Fig. 5. Mean ( $\pm$  SEM) colonic temperature following LPS and saline treatments delivered at the 0 h time point in short-day *ad libitum* fed (SD-AdLib, top panel), long-day *ad libitum* fed (LD-AdLib, middle panel), and long-day (previously) food restricted (LD-FR, bottom panel) male Siberian hamsters.** Black and white bars at the top of the graphs indicate the active, dark (black) and inactive, light (white) phases of the light-dark cycle for each photoperiodic morph. Within each panel: \* $P < 0.05$  versus saline-treated group exposed to the same photoperiod and food treatments. Across panels: # $P < 0.05$  versus LPS-treated SD-AdLib group. ^ $P < 0.05$  from saline-treated LD-AdLib and LD-FR groups.

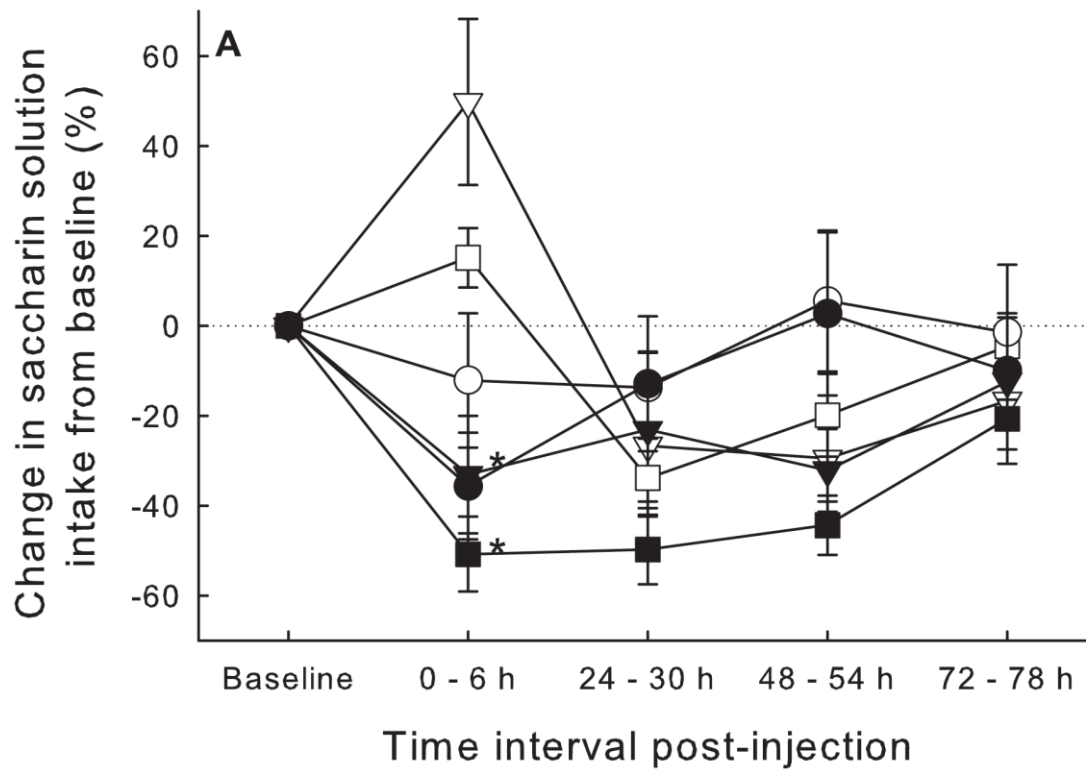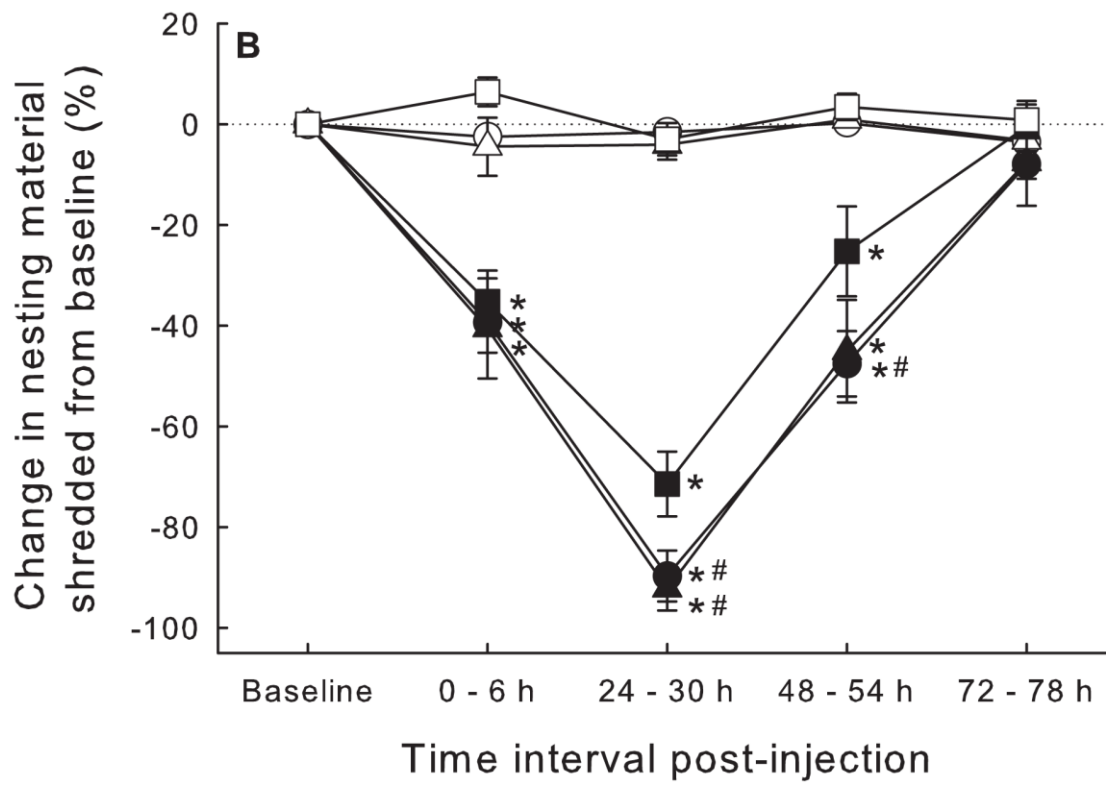

**Fig. 6. Mean ( $\pm$  SEM) percent changes in (A) saccharin solution intake and (B) nesting material shredded from baseline following LPS (black icons) and saline treatment (white icons) delivered at the 0 h time point in short-day *ad libitum* fed (SD-AdLib,  $\bullet$ ), long-day *ad libitum* fed (LD-AdLib,  $\blacktriangle$ ), and long-day (previously) food restricted (LD-FR,  $\blacksquare$ ) male Siberian hamsters. \* $P < 0.05$  versus saline-treated group exposed to the same photoperiod and food treatments. # $P < 0.05$  versus LD-FR LPS-treated group.**

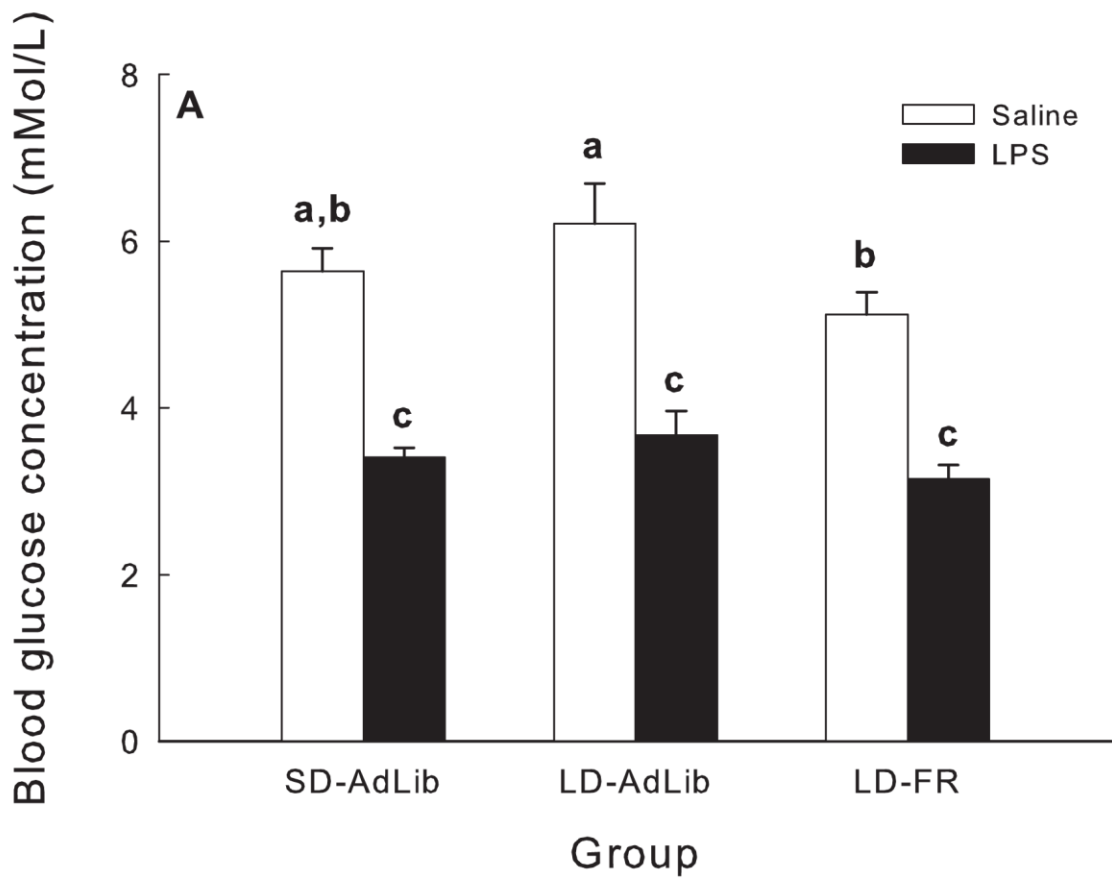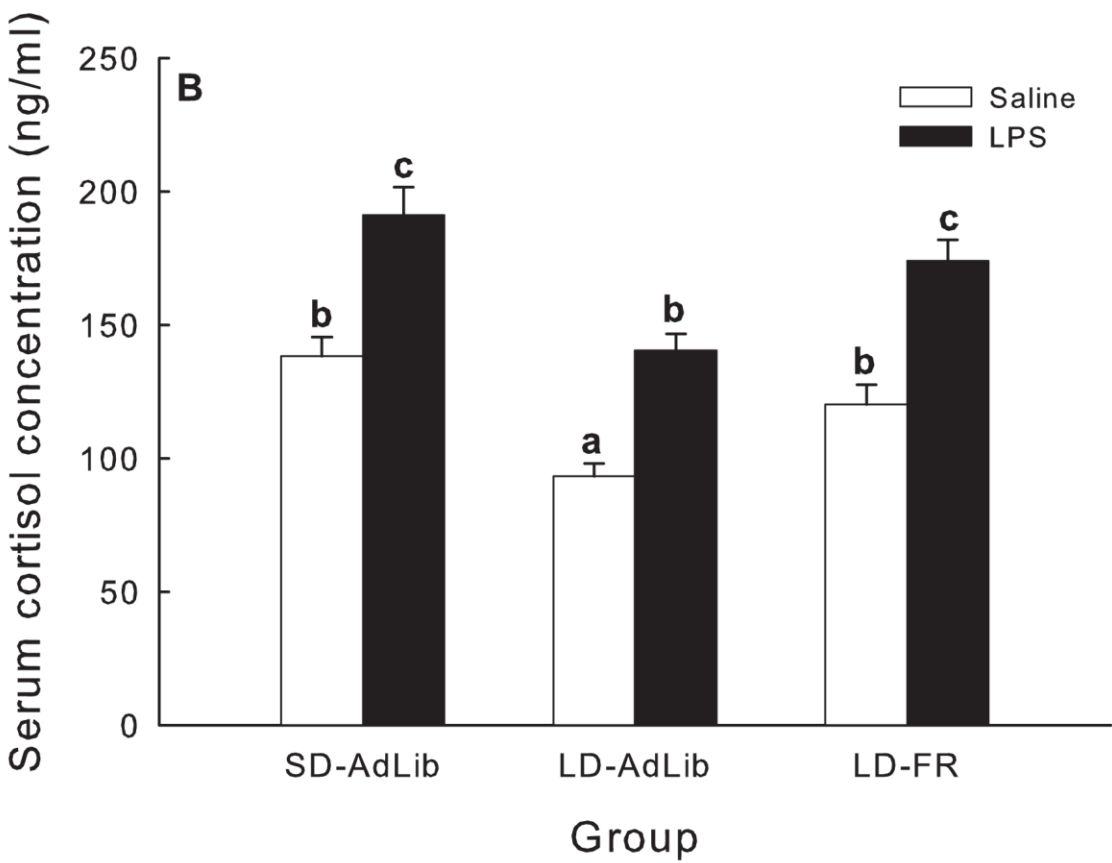



**Fig. 7. Mean ( $\pm$  SEM) (A) blood glucose and (B) circulating serum cortisol concentrations taken 4 h following LPS and saline treatments in short-day *ad libitum* fed (SD-AdLib), long-day *ad libitum* fed (LD-AdLib), and long-day (previously) food restricted (LD-FR) male Siberian hamsters.** Within each panel, groups with different letters indicate statistically significant differences between group means ( $P < 0.05$ ); groups sharing the same letter are statistically equivalent.

**Table 1.** Mean ( $\pm$  SEM) pre-injection baseline food intake, baseline body mass, circulating serum leptin concentrations, baseline saccharin solution intake, and baseline percent nesting material shredded in short-day *ad libitum* fed (SD-AdLib), long-day *ad libitum* fed (LD-AdLib), and long-day (previously) food restricted (LD-FR) male Siberian hamsters. Pre-injection baseline measurements were calculated by averaging the values collected for the measurements during the three days prior to LPS or saline injection. During the five days prior to injection, animals in the LD-FR group were allocated food at 100% of their pre-restriction mean values. Groups with different letters indicate statistically significant differences between group means ( $P < 0.05$ ); groups sharing the same letter are statistically equivalent.

|                                                     | SD-AdLib                     | LD-AdLib                      | LD-FR                         |
|-----------------------------------------------------|------------------------------|-------------------------------|-------------------------------|
| <b>Baseline Food Intake (g/day)</b>                 | 4.1 $\pm$ 0.1 <sup>a</sup>   | 5.0 $\pm$ 0.2 <sup>b</sup>    | 4.8 $\pm$ 0.1 <sup>b</sup>    |
| <b>Baseline Body Mass (g)</b>                       | 35.5 $\pm$ 0.8 <sup>a</sup>  | 45.3 $\pm$ 1.4 <sup>b</sup>   | 37.3 $\pm$ 0.7 <sup>a</sup>   |
| <b>Leptin concentration (pg/ml)</b>                 | 7.07 $\pm$ 0.96 <sup>a</sup> | 18.88 $\pm$ 1.41 <sup>c</sup> | 12.90 $\pm$ 1.15 <sup>b</sup> |
| <b>Baseline Saccharin Solution Intake (g / 6 h)</b> | 1.5 $\pm$ 0.1 <sup>a</sup>   | 1.8 $\pm$ 0.2 <sup>a</sup>    | 3.0 $\pm$ 0.3 <sup>b</sup>    |
| <b>Baseline Percent Nesting Material Shredded</b>   | 99.0 $\pm$ 0.5 <sup>a</sup>  | 93.8 $\pm$ 3.2 <sup>a</sup>   | 85.9 $\pm$ 4.1 <sup>b</sup>   |

**Table 2.** Mean ( $\pm$  SEM) paired testes, inguinal white adipose tissue (IWAT), epididymal WAT (EWAT), retroperitoneal WAT (RWAT), and composite adipose tissue masses from short-day *ad libitum* fed (SD-AdLib), long-day *ad libitum* fed (LD-AdLib), and long-day (previously) food restricted (LD-FR) male Siberian hamsters. Tissue masses were collected via necropsy at the conclusion of the experiment (five days after LPS or saline injection). Groups with different letters indicate statistically significant differences between group means ( $P < 0.05$ ); groups sharing the same letter are statistically equivalent.

|                                          | SD-AdLib                         | LD-AdLib                         | LD-FR                            |
|------------------------------------------|----------------------------------|----------------------------------|----------------------------------|
| <b>Paired testes mass (g)</b>            |                                  |                                  |                                  |
| Saline<br>0.025 <sup>b</sup>             | 0.049 $\pm$ 0.004 <sup>a</sup>   | 0.778 $\pm$ 0.042 <sup>c</sup>   | 0.623 $\pm$ 0.028 <sup>b</sup>   |
| LPS<br>0.028 <sup>b</sup>                | 0.046 $\pm$ 0.003 <sup>a</sup>   | 0.671 $\pm$ 0.033 <sup>b,c</sup> | 0.606 $\pm$ 0.028 <sup>b</sup>   |
| <b>IWAT mass (g)</b>                     |                                  |                                  |                                  |
| Saline<br>0.085 <sup>a</sup>             | 0.488 $\pm$ 0.084 <sup>a</sup>   | 1.062 $\pm$ 0.141 <sup>b</sup>   | 0.627 $\pm$ 0.054 <sup>a</sup>   |
| LPS<br>0.054 <sup>a</sup>                | 0.465 $\pm$ 0.077 <sup>a</sup>   | 1.083 $\pm$ 0.107 <sup>b</sup>   | 0.513 $\pm$ 0.054 <sup>a</sup>   |
| <b>EWAT mass (g)</b>                     |                                  |                                  |                                  |
| Saline<br>0.067 <sup>b</sup>             | 0.357 $\pm$ 0.044 <sup>a</sup>   | 0.935 $\pm$ 0.109 <sup>b,c</sup> | 0.624 $\pm$ 0.055 <sup>b</sup>   |
| LPS<br>0.055 <sup>b</sup>                | 0.340 $\pm$ 0.049 <sup>a</sup>   | 0.999 $\pm$ 0.119 <sup>c</sup>   | 0.610 $\pm$ 0.055 <sup>b</sup>   |
| <b>RWAT mass (g)</b>                     |                                  |                                  |                                  |
| Saline<br>0.019 <sup>c,d</sup>           | 0.057 $\pm$ 0.009 <sup>a</sup>   | 0.164 $\pm$ 0.024 <sup>c</sup>   | 0.106 $\pm$ 0.012 <sup>b,c</sup> |
| LPS<br>0.012 <sup>b,c</sup>              | 0.064 $\pm$ 0.011 <sup>a,b</sup> | 0.155 $\pm$ 0.018 <sup>d,e</sup> | 0.087 $\pm$ 0.012 <sup>b,c</sup> |
| <b>Composite adipose tissue mass (g)</b> |                                  |                                  |                                  |
| Saline<br>0.166 <sup>b</sup>             | 0.902 $\pm$ 0.133 <sup>a</sup>   | 2.160 $\pm$ 0.264 <sup>c</sup>   | 1.357 $\pm$ 0.112 <sup>b</sup>   |
| LPS<br>0.112 <sup>b</sup>                | 0.869 $\pm$ 0.134 <sup>a</sup>   | 2.237 $\pm$ 0.237 <sup>c</sup>   | 1.210 $\pm$ 0.112 <sup>b</sup>   |
